# Supplementary material for: Improved catalysts for hydrogen evolution reaction in alkaline solutions through the electrochemical formation of nickel-reduced graphene oxide interface
Source: Royal Society of Chemistry journal article supplement (doi:10.1039/c7cp01237c), 2017-01-01
Supplement: c7cp01237c1.pdf [file c7cp01237c1.pdf]

## **S u p p l e m e n t a r y   i n f o r m a t i o n**

### **Improved catalyst for hydrogen evolution reaction in alkaline solutions through the electrochemical formation of nickel-reduced graphene oxide interface**

Sanjin J. Gutić<sup>1</sup>, Ana S. Dobrota<sup>2</sup>, Mikael Leetmaa<sup>3</sup>, Natalia V. Skorodumova<sup>3,4</sup>, Slavko V. Mentus,<sup>2,5</sup> Igor A. Pašti<sup>2\*</sup>

<sup>1</sup>*Department of Chemistry, Faculty of Science, Zmaja od Bosne 33-35, 71000 Sarajevo, Bosnia and Herzegovina*

<sup>2</sup>*University of Belgrade, Faculty of Physical Chemistry, Studentski trg 12-16, 11158 Belgrade, Serbia*

<sup>3</sup>*Department of Materials Science and Engineering, KTH - Royal Institute of Technology, Brinellvägen 23, 100 44 Stockholm, Sweden*

<sup>4</sup>*Department of Physics and Astronomy, Uppsala University, Box 516, 751 20 Uppsala, Sweden*

<sup>5</sup>*Serbian Academy of Sciences and Arts, Knez Mihajlova 35, 11000 Belgrade, Serbia*

#### **\*Corresponding author:**

Dr. Igor A. Pašti, associate professor

University of Belgrade – Faculty of Physical Chemistry

Studentski trg 12-16, 11158 Belgrade, Serbia

E-mail: igor@ffh.bg.ac.rs

Phone: +381 11 3336 628

Fax: +381 11 2187 133

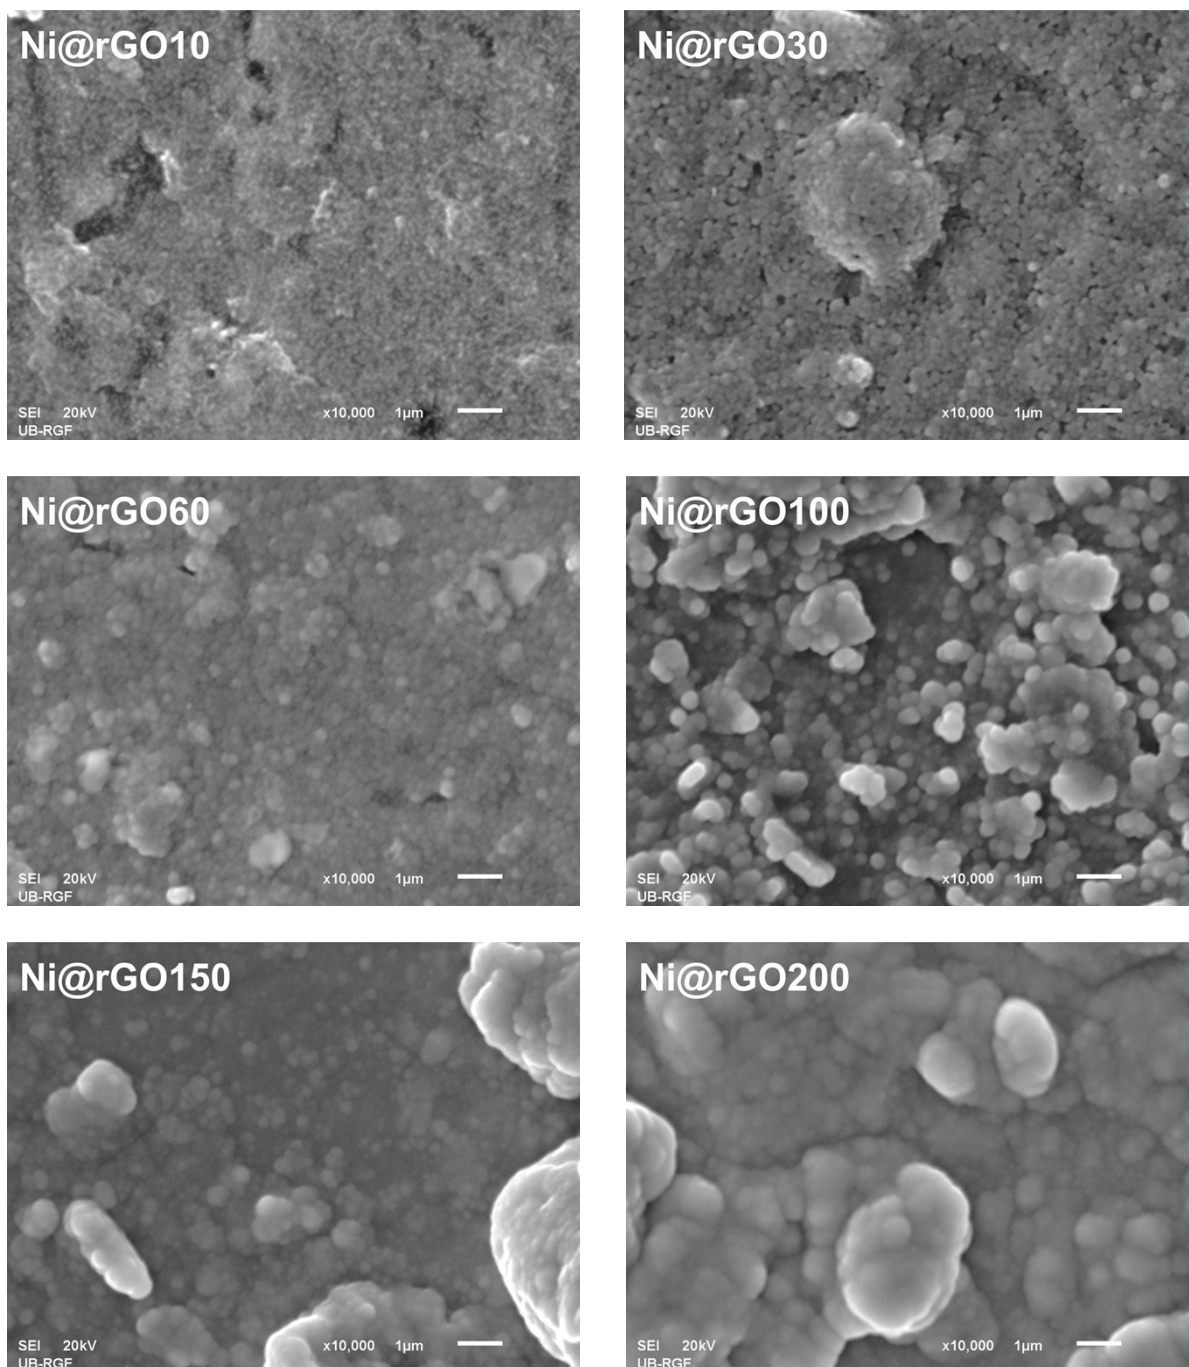

**Figure S1.** SEM micrographs of Ni@rGO composites obtained at constant potential (shown in reduced scale in the Fig. 3 in the main text)

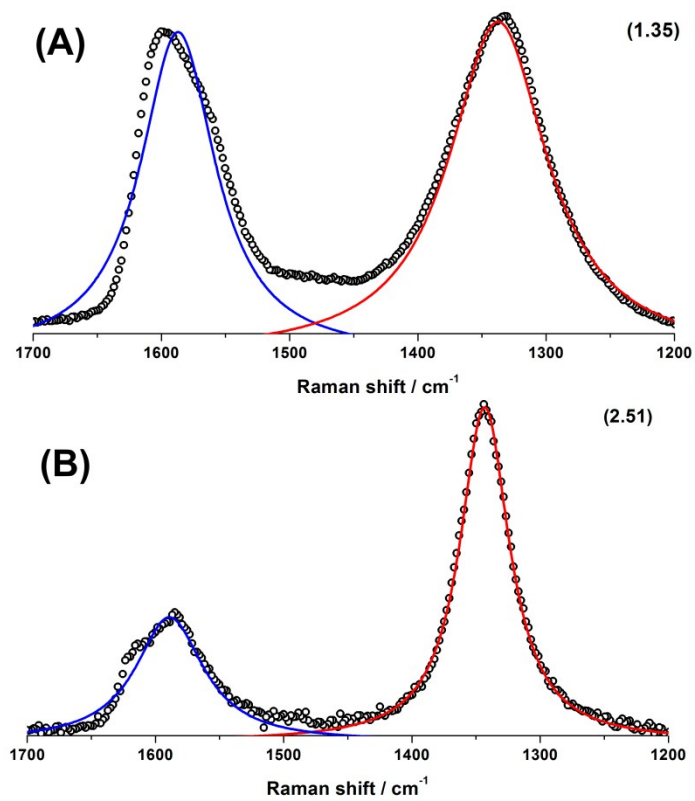

**Figure S2.** Raman spectra of drop-casted GO (A) and rGO obtained at  $-1.2$  V vs. Ag/AgCl (B, the same potential used for the preparation of the composite electrodes) in the solution of  $\text{Na}_2\text{SO}_4$  without nickel salt. Numbers in parentheses indicate  $I_D/I_G$  ratio.

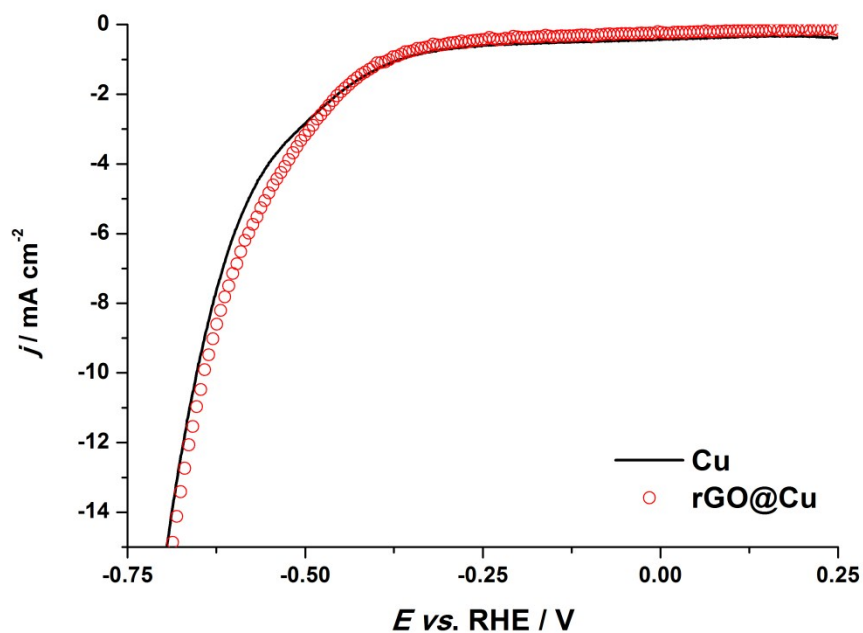

**Figure S3.** Pseudostationary voltammograms for HER in 1 M KOH at clean Cu surface and rGO@Cu surface. The rGO@Cu electrode was prepared by potentiostatic reduction of GO at  $-1.2$  V vs. Ag/AgCl in  $\text{Na}_2\text{SO}_4$ , in the absence of nickel salt.
